# Supplementary material
Source: PubMed Central journal article supplement (PMC3093679)
Supplement: bjp.bp.110.082677_1.pdf [file bjp.bp.110.082677_1.pdf]

## Data supplement

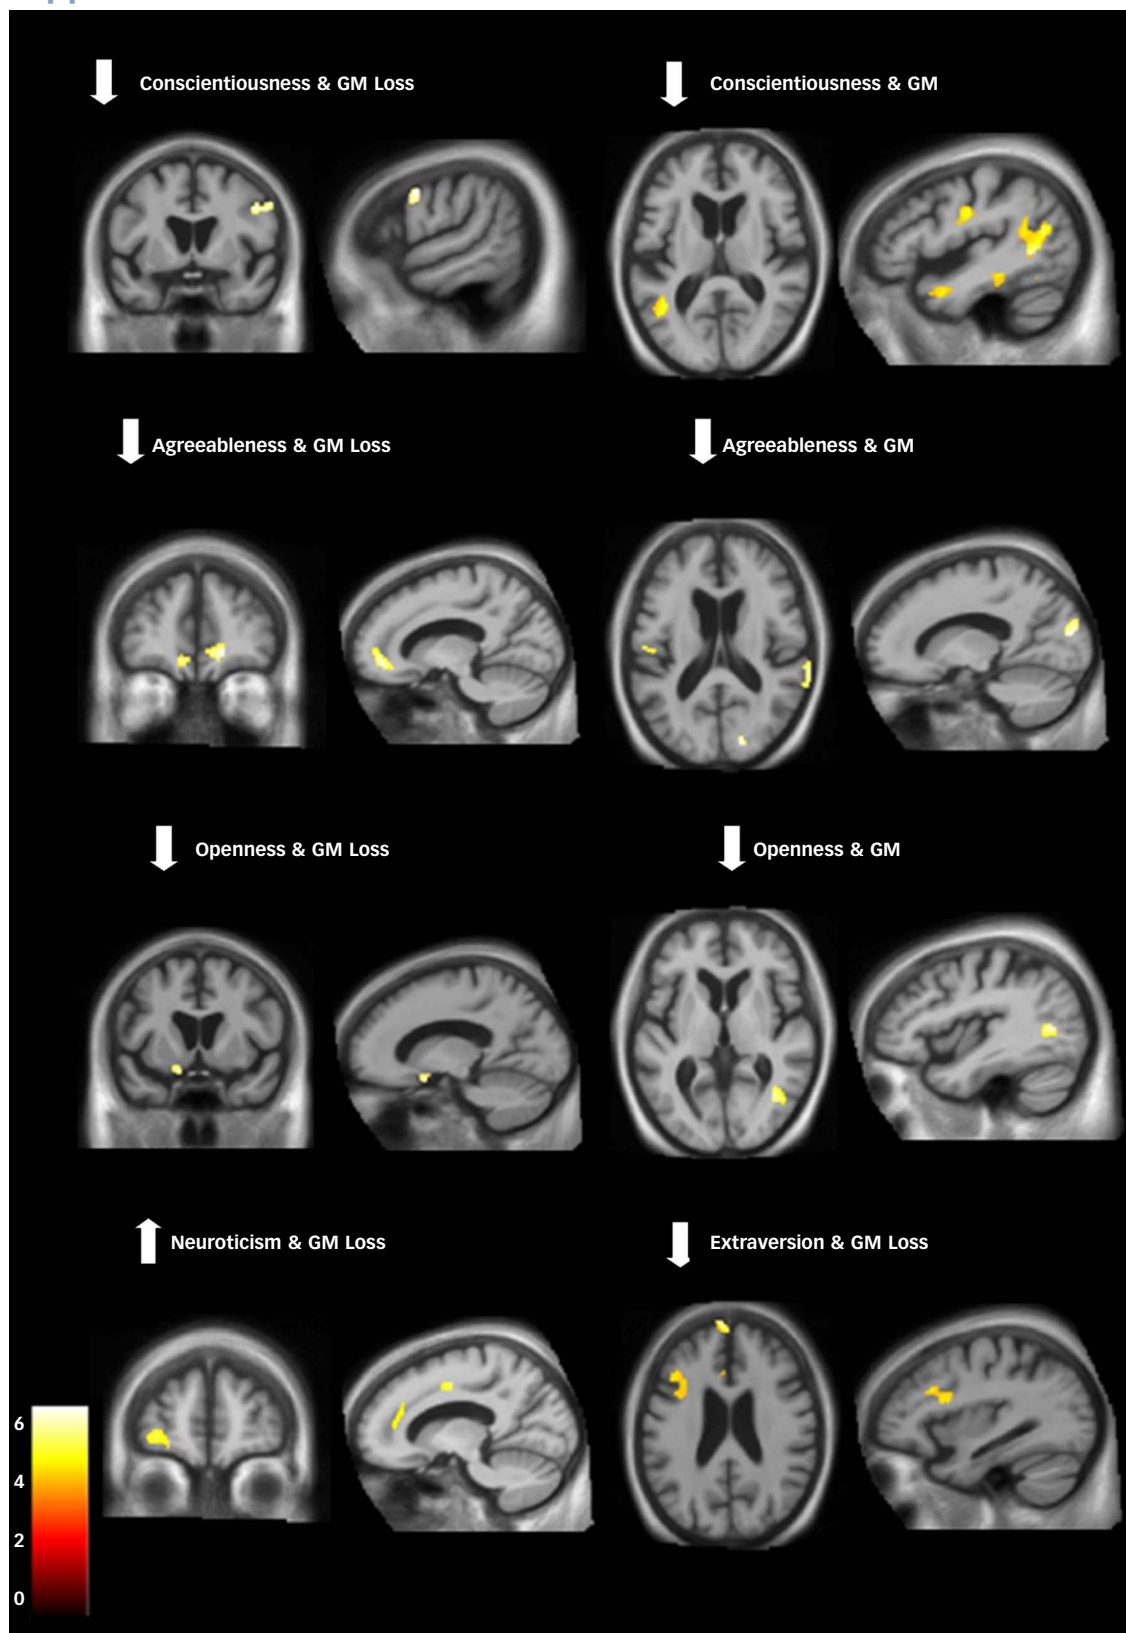

**Fig. DS1** Voxel-based morphometry correlates of personality change in frontotemporal lobar degeneration (FTLD).

For each personality trait, panels show statistical parametric maps of associated grey matter loss (GM loss) or relative grey matter preservation (GM). Maps have been rendered on the mean  $T_1$ -weighted normalised brain image for the FTLD group; the left hemisphere is presented on the left. For display purposes, maps are thresholded at  $P < 0.001$  uncorrected for all results.  $T$ -scores of grey matter change are coded as indicated on the colour bar (lower left).
